# Supplementary material for: Sex difference in atrial fibrillation recurrence after catheter ablation and antiarrhythmic drugs
Source: PubMed Central journal article supplement — Heart. 2022 Mar 24;109(7):519–26. doi: 10.1136/heartjnl-2021-320601 (PMC10086497; doi:10.1136/heartjnl-2021-320601), 2022-03-24

**Supplementary Table 1. Locations of extra-PV triggers during de novo AFCA**

|                    | Overall<br>(n=1864) | Female<br>(n=528) | Male<br>(n=1336) | P value |
|--------------------|---------------------|-------------------|------------------|---------|
| Extra-PV trigger   | 217 (11.6)          | 86 (16.3)         | 131 (9.8)        | <0.001  |
| Unmappable         | 16 (7.4)            | 7 (8.1)           | 9 (6.9)          |         |
| SVC                | 41 (18.9)           | 21 (24.4)         | 20 (15.3)        |         |
| RA                 | 29 (13.4)           | 11 (12.8)         | 18 (13.7)        |         |
| Interatrial septum | 59 (27.2)           | 23 (26.7)         | 36 (27.5)        |         |
| Coronary sinus     | 36 (16.6)           | 12 (14.0)         | 24 (18.3)        |         |
| LA                 | 25 (11.5)           | 7 (8.1)           | 18 (13.7)        |         |
| LOM                | 11 (5.1)            | 5 (5.8)           | 6 (4.6)          |         |

AFCA, atrial fibrillation catheter ablation; LA, left atrium; LOM, ligament of Marshall; PV, pulmonary vein;

RA, right atrium; SVC, superior vena cava.

**Supplementary Table 2. Clinical rhythm outcomes after de novo AFCA**

|                                            | Overall<br>(n=2999) | Female<br>(n=794) | Male<br>(n=2205) | P value |
|--------------------------------------------|---------------------|-------------------|------------------|---------|
| Follow-up months                           | 48.2 ± 34.9         | 50.1 ± 34.2       | 47.6 ± 35.1      | 0.081   |
| Post-ABL medication                        |                     |                   |                  |         |
| ACEi, or ARB, n (%)                        | 1024 (34.2)         | 267 (33.7)        | 757 (34.4)       | 0.745   |
| Beta blocker, n (%)                        | 1122 (37.5)         | 281 (35.4)        | 841 (38.2)       | 0.180   |
| Statin, n (%)                              | 936 (31.3)          | 272 (34.3)        | 664 (30.2)       | 0.035   |
| AAD Use                                    |                     |                   |                  |         |
| AADs at discharge, n (%)                   | 853 (28.5)          | 240 (30.3)        | 613 (27.8)       | 0.203   |
| AADs after 3 months, n (%)                 | 1144 (38.2)         | 338 (42.6)        | 806 (36.6)       | 0.003   |
| AADs at final follow-up, n (%)             | 981 (32.7)          | 313 (39.4)        | 668 (30.3)       | <0.001  |
| Early recurrence, n (%)                    |                     |                   |                  |         |
| Recurrence type AF, n (% in early recur)   | 665 (68.6)          | 176 (65.7)        | 489 (69.8)       | 0.251   |
| Recurrence type AT, n (% in early recur)   | 304 (31.4)          | 92 (34.3)         | 212 (30.2)       | 0.251   |
| Clinical recurrence, n (%)                 |                     |                   |                  |         |
| AF recurrence, n (% in recur/% in overall) | 790 (72.2/26.3)     | 233 (71.5/29.3)   | 557 (72.5/25.3)  | 0.778   |
| AT recurrence, n (% in recur/% in overall) | 304 (27.8/10.1)     | 93 (28.5/11.7)    | 211 (27.5/9.6)   | 0.778   |
| Cardioversion, n (% in recur/% in overall) | 310 (28.3/10.3)     | 77 (23.6/9.7)     | 233 (30.3/10.6)  | 0.029   |

AAD antiarrhythmic drug; ACEi, angiotensin-converting enzyme inhibitor; AF, atrial fibrillation; AFCA, atrial fibrillation catheter ablation; ARB, angiotensin receptor blocker; AT, atrial tachycardia.

**Supplementary Table 3. Baseline characteristics of patients with a de novo ablation before and after propensity score matching**

|                                             | Before PS matching  |                   |                  | P value | After PS matching  |                   |                 | P value |
|---------------------------------------------|---------------------|-------------------|------------------|---------|--------------------|-------------------|-----------------|---------|
|                                             | Overall<br>(n=2999) | Female<br>(n=794) | Male<br>(n=2205) |         | Overall<br>(n=938) | Female<br>(n=469) | Male<br>(n=469) |         |
| Age, years                                  | 58.3 ± 10.9         | 61.1 ± 10.7       | 57.2 ± 10.8      | <0.001  | 61.7 ± 10.0        | 61.7 ± 9.9        | 61.8 ± 10.2     | 0.930   |
| Persistent AF (%)                           | 956 (31.9)          | 218 (27.5)        | 738 (33.5)       | 0.002   | 251 (26.8)         | 122 (26.0)        | 129 (27.5)      | 0.658   |
| BSA                                         | 1.8 ± 0.2           | 1.6 ± 0.1         | 1.9 ± 0.2        | <0.001  | 1.7 ± 0.1          | 1.7 ± 0.1         | 1.7 ± 0.1       | 0.065   |
| Comorbidities (%)                           |                     |                   |                  |         |                    |                   |                 |         |
| Heart failure                               | 352 (11.7)          | 122 (15.4)        | 230 (10.4)       | <0.001  | 93 (9.9)           | 52 (11.1)         | 41 (8.7)        | 0.275   |
| Hypertension                                | 1381 (46.0)         | 378 (47.6)        | 1003 (45.5)      | 0.324   | 453 (48.3)         | 242 (51.6)        | 211 (45.0)      | 0.050   |
| Diabetes                                    | 453 (15.1)          | 109 (13.7)        | 344 (15.6)       | 0.228   | 149 (15.9)         | 72 (15.4)         | 77 (16.4)       | 0.721   |
| Stroke or TIA                               | 337 (11.2)          | 104 (13.1)        | 233 (10.6)       | 0.061   | 113 (12.0)         | 54 (11.5)         | 59 (12.6)       | 0.688   |
| Vascular disease                            | 316 (10.5)          | 61 (7.7)          | 255 (11.6)       | 0.003   | 101 (10.8)         | 36 (7.7)          | 65 (13.9)       | 0.003   |
| CHA <sub>2</sub> DS <sub>2</sub> VASc score | 1.7 ± 1.5           | 2.6 ± 1.5         | 1.4 ± 1.4        | <0.001  | 2.1 ± 1.5          | 2.6 ± 1.5         | 1.6 ± 1.5       | <0.001  |
| Non-Gender                                  |                     |                   |                  |         |                    |                   |                 |         |
| CHA <sub>2</sub> DS <sub>2</sub> VA score   | 1.4 ± 1.4           | 1.6 ± 1.5         | 1.4 ± 1.4        | <0.001  | 1.6 ± 1.5          | 1.6 ± 1.5         | 1.6 ± 1.5       | 0.755   |
| Echocardiographic parameters                |                     |                   |                  |         |                    |                   |                 |         |
| LA dimension, mm                            | 41.4 ± 6.2          | 40.6 ± 6.3        | 41.6 ± 6.2       | <0.001  | 40.4 ± 6.0         | 40.4 ± 5.7        | 40.5 ± 6.3      | 0.911   |
| LV ejection fraction, %                     | 63.1 ± 8.4          | 64.8 ± 8.0        | 62.5 ± 8.4       | <0.001  | 64.5 ± 7.6         | 64.4 ± 7.3        | 64.7 ± 7.9      | 0.460   |
| E/Em                                        | 10.2 ± 4.4          | 12.2 ± 5.4        | 9.5 ± 3.8        | <0.001  | 11.1 ± 4.7         | 11.2 ± 4.0        | 11.1 ± 5.3      | 0.855   |
| LAA flow velocity, cm/s (n=1421)            | 48.2 ± 22.1         | 45.0 ± 22.0       | 49.5 ± 22.1      | 0.001   | 47.5 ± 21.4        | 46.7 ± 20.8       | 48.1 ± 22.0     | 0.492   |
| LA voltage (n=2119)                         | 1.3 ± 0.7           | 1.1 ± 0.6         | 1.4 ± 1.4        | <0.001  | 1.3 ± 0.6          | 1.2 ± 0.6         | 1.4 ± 0.6       | 0.005   |
| Procedure time, min                         |                     |                   |                  |         |                    |                   |                 |         |
|                                             | 171.5 ± 55.9        | 170.5 ± 52.8      | 171.8 ± 56.9     | 0.553   | 171.0 ± 53.5       | 168.6 ± 51.5      | 173.3 ± 55.3    | 0.175   |
| Ablation time, s                            |                     |                   |                  |         |                    |                   |                 |         |
|                                             | 4429.5 ± 1702.9     | 4235.4 ± 1594.9   | 4499.4 ± 1735.2  | <0.001  | 4348.0 ± 1602.6    | 4212.0 ± 1547.2   | 4484.0 ± 1646.5 | 0.009   |
| Ablation lesions (%)                        |                     |                   |                  |         |                    |                   |                 |         |
| CPVI                                        | 2999 (100)          | 794 (100)         | 2201 (100)       |         | 938 (100.0)        | 469 (100.0)       | 469 (100.0)     |         |
| CTI                                         | 2651 (88.5)         | 704 (88.9)        | 1947 (88.4)      | 0.771   | 839 (89.6)         | 414 (88.7)        | 425 (90.6)      | 0.379   |
| Empirical extra-PV LA ablation*             | 932 (31.1)          | 230 (29.0)        | 702 (31.8)       | 0.146   | 259 (27.6)         | 119 (25.4)        | 140 (29.9)      | 0.144   |
| Posterior box                               | 873 (29.1)          | 217 (27.3)        | 656 (29.8)       | 0.214   | 239 (25.5)         | 111 (23.7)        | 128 (27.3)      | 0.231   |

|                              |            |            |            |        |            |           |           |       |
|------------------------------|------------|------------|------------|--------|------------|-----------|-----------|-------|
| Anterior line                | 633 (21.1) | 157 (19.8) | 476 (21.6) | 0.310  | 166 (17.7) | 75 (16.1) | 91 (19.4) | 0.210 |
| Mitral isthmus line          | 141 (4.7)  | 38 (4.8)   | 103 (4.7)  | 0.982  | 38 (4.1)   | 17 (3.6)  | 21 (4.5)  | 0.615 |
| CFAE ablation                | 140 (4.7)  | 23 (2.9)   | 117 (5.3)  | 0.008  | 41 (4.4)   | 16 (3.4)  | 25 (5.3)  | 0.204 |
| Extra-PV trigger<br>(n=1864) | 217 (11.6) | 86 (16.3)  | 131 (9.8)  | <0.001 | 80 (12.5)  | 46 (14.5) | 34 (10.5) | 0.160 |

AF, atrial fibrillation; BSA, body surface area; CFAE, complex fractionated atrial electrograms; CPVI, circumferential pulmonary vein isolation; CTI, carotricuspid isthmus; E/Em, the ratio of the early diastolic mitral inflow velocity (E) to the early mitral annular velocity (Em); LA, left atrium; LAA, left atrium appendage; LV, left ventricle; PV, pulmonary vein; TIA, transient ischemic attack.

\* Additional ablation lesions other than the pulmonary veins in the LA.

Variables are presented as the mean  $\pm$  standard deviation or count (percentage)

**Supplementary Table 4. Baseline characteristics of patients with AAD use after AF recurrence before and after propensity score matching**

|                                                           | Before PS matching                         |                    |                    |            | After PS matching                          |                    |                    |            |
|-----------------------------------------------------------|--------------------------------------------|--------------------|--------------------|------------|--------------------------------------------|--------------------|--------------------|------------|
|                                                           | AAD user<br>after<br>recurrence<br>(n=788) | Female<br>(n=228)  | Male<br>(n=560)    | P<br>value | AAD user<br>after<br>recurrence<br>(n=280) | Female<br>(n=140)  | Male<br>(n=140)    | P<br>value |
| Age, years                                                | 59.1 ± 10.5                                | 61.2 ± 10.5        | 58.3 ± 10.3        | <0.001     | 62.2 ± 9.6                                 | 62.1 ± 9.1         | 62.3 ± 10.2        | 0.892      |
| Persistent AF (%)                                         | 317 (40.2)                                 | 68 (29.8)          | 249 (44.5)         | <0.001     | 89 (31.8)                                  | 46 (32.9)          | 43 (30.7)          | 0.797      |
| BSA                                                       | 1.8 ± 0.2                                  | 1.7 ± 0.1          | 1.9 ± 0.2          | <0.001     | 1.7 ± 0.1                                  | 1.7 ± 0.1          | 1.7 ± 0.1          | 0.519      |
| Total follow up, mo                                       | 45.6 ± 30.5                                | 42.6 ± 27.2        | 46.8 ± 31.7        | 0.063      | 45.8 ± 28.5                                | 44.1 ± 27.0        | 47.5 ± 30.0        | 0.320      |
| Time (recurrence ~<br><i>de novo</i> AFCA), mo            | 21.9 ± 22.3                                | 25.3 ± 22.4        | 20.5 ± 22.1        | 0.007      | 23.8 ± 23.6                                | 25.5 ± 23.7        | 22.0 ± 23.4        | 0.222      |
| Comorbidities (%)                                         |                                            |                    |                    |            |                                            |                    |                    |            |
| Heart failure                                             | 94 (11.9)                                  | 39 (17.1)          | 55 (9.8)           | 0.006      | 32 (11.4)                                  | 17 (12.1)          | 15 (10.7)          | 0.851      |
| Hypertension                                              | 387 (49.1)                                 | 120 (52.6)         | 267 (47.7)         | 0.237      | 140 (50.0)                                 | 80 (57.1)          | 60 (42.9)          | 0.023      |
| Diabetes                                                  | 134 (17.0)                                 | 35 (15.4)          | 99 (17.7)          | 0.494      | 52 (18.6)                                  | 24 (17.1)          | 28 (20.0)          | 0.645      |
| Stroke or TIA                                             | 101 (12.8)                                 | 32 (14.0)          | 69 (12.3)          | 0.593      | 37 (13.2)                                  | 19 (13.6)          | 18 (12.9)          | 1.000      |
| Vascular disease                                          | 99 (12.6)                                  | 24 (10.5)          | 75 (13.4)          | 0.326      | 41 (14.6)                                  | 17 (12.1)          | 24 (17.1)          | 0.310      |
| Non-gender<br>CHA <sub>2</sub> DS <sub>2</sub> VASc score | 1.5 ± 1.4                                  | 1.7 ± 1.5          | 1.5 ± 1.4          | 0.029      | 1.8 ± 1.5                                  | 1.8 ± 1.5          | 1.7 ± 1.5          | 0.872      |
| Echocardiographic<br>parameters                           |                                            |                    |                    |            |                                            |                    |                    |            |
| LA dimension, mm                                          | 42.5 ± 6.3                                 | 40.9 ± 6.0         | 43.2 ± 6.3         | <0.001     | 41.3 ± 5.8                                 | 41.3 ± 5.4         | 41.2 ± 6.1         | 0.925      |
| LV ejection<br>fraction, %                                | 62.6 ± 8.3                                 | 63.7 ± 8.1         | 62.2 ± 8.3         | 0.015      | 63.9 ± 7.7                                 | 64.1 ± 7.8         | 63.6 ± 7.7         | 0.564      |
| E/Em                                                      | 10.4 ± 4.3                                 | 12.2 ± 5.2         | 9.7 ± 3.6          | <0.001     | 11.1 ± 4.1                                 | 10.9 ± 3.3         | 11.3 ± 4.7         | 0.364      |
| Procedure time, min                                       | 186.4 ±<br>59.3                            | 178.8 ±<br>51.9    | 189.5 ±<br>61.8    | 0.014      | 181.0 ±<br>50.3                            | 181.4 ±<br>46.0    | 180.6 ±<br>54.4    | 0.898      |
| Ablation time, s                                          | 4925.8 ±<br>1806.0                         | 4580.1 ±<br>1561.8 | 5065.7 ±<br>1879.2 | <0.001     | 4745.1 ±<br>1541.0                         | 4786.2 ±<br>1415.1 | 4704.6 ±<br>1659.8 | 0.660      |
| Ablation lesions (%)                                      |                                            |                    |                    |            |                                            |                    |                    |            |
| CPVI                                                      | 788 (100.0)                                | 228 (100.0)        | 560 (100.0)        |            | 280 (100.0)                                | 140 (100.0)        | 140 (100.0)        |            |
| CTI                                                       | 716 (91.1)                                 | 204 (89.9)         | 512 (91.6)         | 0.528      | 258 (92.5)                                 | 128 (92.1)         | 130 (92.9)         | 0.986      |
| Empirical extra-PV<br>LA ablation*                        | 329 (41.8)                                 | 71 (31.1)          | 258 (46.1)         | <0.001     | 95 (33.9)                                  | 46 (32.9)          | 49 (35.0)          | 0.801      |

|                              |            |            |            |       |            |           |           |       |
|------------------------------|------------|------------|------------|-------|------------|-----------|-----------|-------|
| Extra-PV trigger             | 72 (14.9)  | 29 (18.0)  | 43 (13.3)  | 0.217 | 30 (15.2)  | 16 (14.8) | 14 (15.7) | 1.000 |
| AAD use after recurrence (%) |            |            |            | 0.944 |            |           |           | 1.000 |
| Class IC                     | 294 (37.3) | 86 (37.7)  | 208 (37.1) |       | 98 (35.0)  | 49 (35.0) | 49 (35.0) |       |
| Class III                    | 494 (62.7) | 142 (62.3) | 352 (62.9) |       | 182 (65.0) | 91 (65.0) | 91 (65.0) |       |
| Amiodarone                   | 269 (34.1) | 63 (27.6)  | 206 (36.8) | 0.018 | 88 (31.4)  | 39 (27.9) | 49 (35.0) | 0.247 |

AAD, antiarrhythmic drug; AF, atrial fibrillation; AFCA, atrial fibrillation catheter ablation; BSA, body surface area; CPVI, circumferential pulmonary vein isolation; CTI, carvotricuspid isthmus; E/Em, the ratio of the early diastolic mitral inflow velocity (E) to the early mitral annular velocity (Em); LA, left atrium; LV, left ventricle; PV, pulmonary vein; TIA, transient ischemic attack.

\* Additional ablation lesions other than the pulmonary veins in the LA.

Variables are presented as the mean  $\pm$  standard deviation or count (percentage)

**Supplementary Table 5. Adverse effects and types of AADs**

|                                 | Overall<br>(n=788) | Female<br>(n=228) | Male<br>(n=560) | P value |
|---------------------------------|--------------------|-------------------|-----------------|---------|
| Side effects of AADs            | 107 (13.6)         | 33 (14.5)         | 74 (13.2)       | 0.724   |
| Thyroid dysfunction             | 44 (5.6)           | 11 (4.8)          | 33 (5.9)        |         |
| Liver function test abnormality | 14 (1.8)           | 3 (1.3)           | 11 (2.0)        |         |
| QT prolongation                 | 1 (0.1)            | 0 (0)             | 1 (0.2)         |         |
| Sinus node dysfunction          | 35 (4.4)           | 13 (5.7)          | 22 (3.9)        |         |
| Interstitial pulmonary fibrosis | 2 (0.3)            | 1 (0.4)           | 1 (0.2)         |         |
| Others*                         | 11 (1.4)           | 5 (2.2)           | 6 (1.1)         |         |
| Duration of AAD use, mo         | 23.6 ± 23.7        | 24.1 ± 20.8       | 23.4 ± 24.8     | 0.702   |
| Flecainide (%)                  | 256 (31.6)         | 75 (32.9)         | 181 (32.3)      | 0.943   |
| Propafenone (%)                 | 31 (3.8)           | 10 (4.4)          | 21 (3.8)        | 0.830   |
| Pilsicainide (%)                | 5 (0.6)            | 1 (0.4)           | 4 (0.7)         | 1.000   |
| Amiodarone (%)                  | 269 (34.1)         | 63 (27.6)         | 206 (36.8)      | 0.018   |
| Dronedarone (%)                 | 157 (19.4)         | 56 (24.6)         | 101 (18.0)      | 0.048   |
| Sotalolol (%)                   | 70 (8.7)           | 24 (10.5)         | 46 (8.2)        | 0.370   |

AAD, antiarrhythmic drug.

\* Dyspnea, bradycardia, urticarial, edema.

**Supplementary Figure 1. Risk of AF recurrence without AAD according to the sex after the *de novo* AFCA (A) and according to age after *de novo* AFCA (B). AAD, antiarrhythmic drug; AT, atrial tachycardia; AF, atrial fibrillation; AFCA, atrial fibrillation catheter ablation.**

A. Sex-dependent Rhythm outcome off-AAD after *de novo* AFCA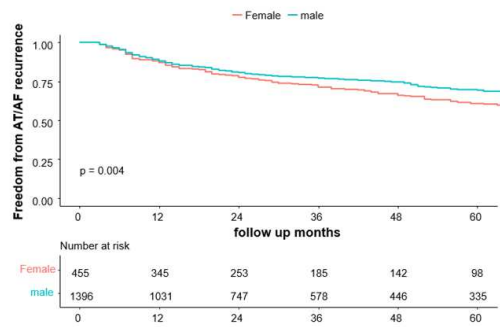B. Age-dependent Rhythm outcome off-AAD after *de novo* AFCA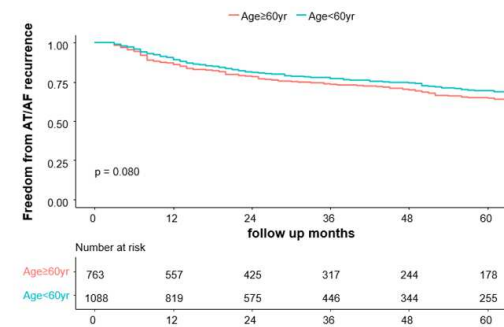



**Supplementary Figure 2. Propensity score matching in each group.** AF, atrial fibrillation; AFCA, atrial fibrillation catheter ablation; AAD, antiarrhythmic drug.

A. *De novo* AFCA

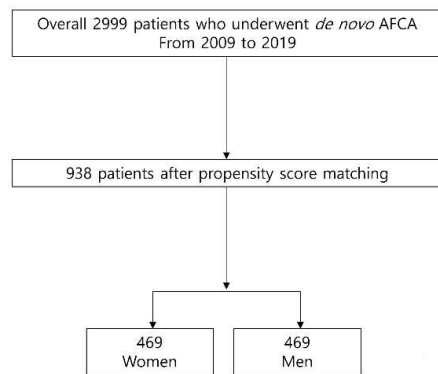

B. AAD use (post-AFCA recurrence)

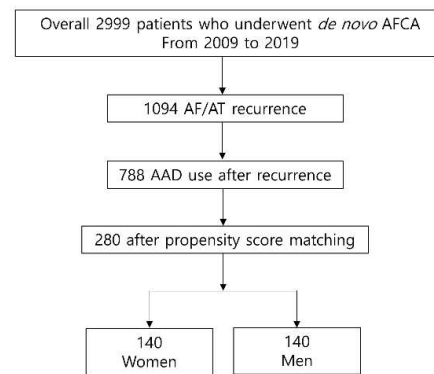

**Supplementary Figure 3. AF recurrence according to the sex after the de novo AFCA (A) and AAD use in patients with AF recurrence after AFCA (B) and according to the age after de novo AFCA. AF, atrial fibrillation; AFCA, atrial fibrillation catheter ablation; AAD, antiarrhythmic drug.**

A. Sex-dependent Rhythm outcome after *de novo* AFCA

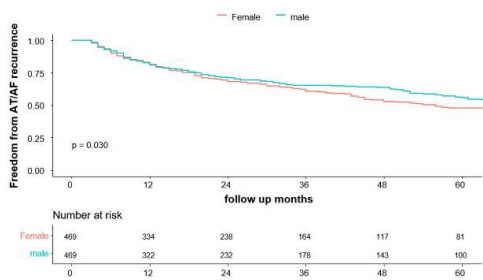

B. Sex-dependent Rhythm outcome after AAD use (post-AFCA recurrence)

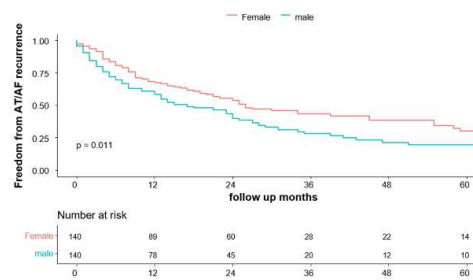

**Supplementary Figure 4. AF recurrence after De novo AFCA (A) and AAD use (B) according to the age and sex.** AF, atrial fibrillation; AFCA, atrial fibrillation catheter ablation; AAD, antiarrhythmic drug.

A. Rhythm outcome after *de novo* AFCA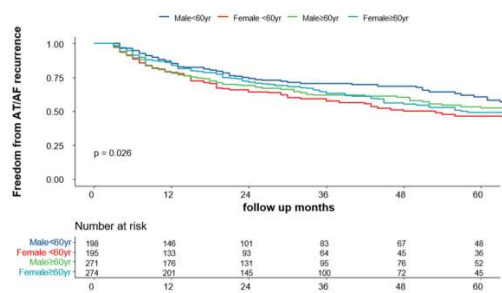

B. Rhythm outcome after AAD use (post-AFCA recurrence)

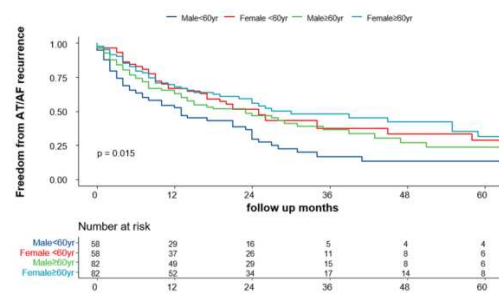

**Supplementary Figure 5. Risk of AF recurrence after AAD use according to the sex in the group with Class IC AADs (A) and Class III AADs (B) and the age in the group with Class I AADs (C) and Class III AADs (D). AAD, antiarrhythmic drug; AF, atrial fibrillation.**

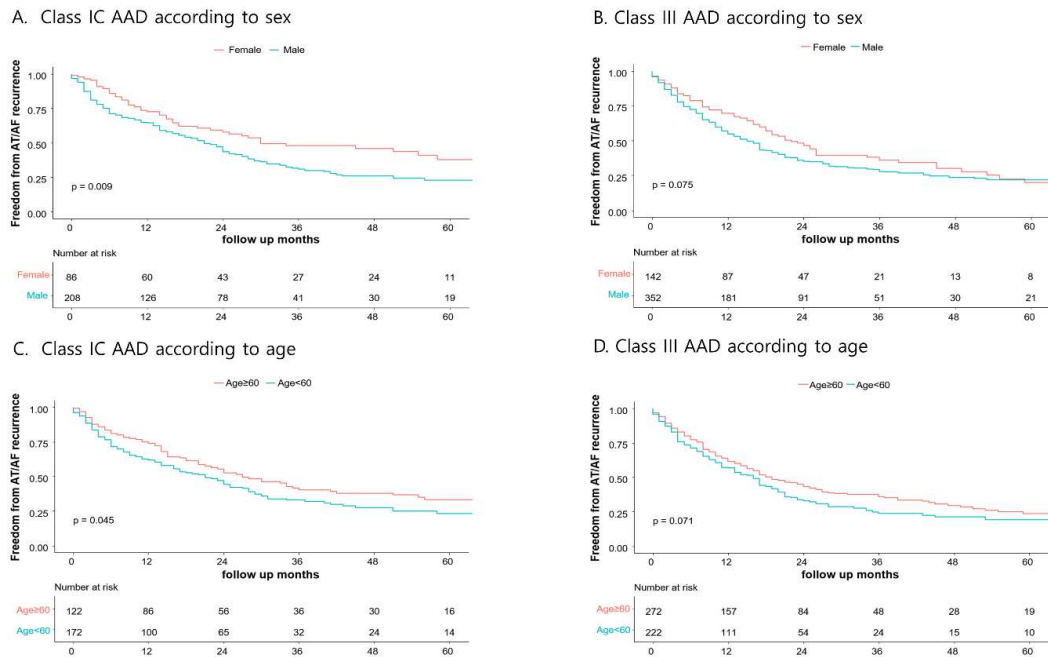

Supplement: heartjnl-2021-320601supp001.pdf [file heartjnl-2021-320601supp001.pdf]
